# Supplementary material
Source: PubMed Central journal article supplement (PMC4851917)
Supplement: NIHMS774125-supplement-01.pdf [file NIHMS774125-supplement-01.pdf]

**eTable 1. Cohort Selection Criteria**

| <b>Step</b> | <b>Description</b>                                                                                             | <b>Number of patients</b> | <b>Number excluded</b> |
|-------------|----------------------------------------------------------------------------------------------------------------|---------------------------|------------------------|
| 1           | Individuals age 66 and older diagnosed with breast cancer in SEER-Medicare data between 2000 to 2008           | 196887                    |                        |
| 2           | Female sex                                                                                                     | 195217                    | 1670                   |
| 3           | Exclude if histology not consistent with epithelial origin                                                     | 187011                    | 8206                   |
| 4           | Exclude if pure lobular carcinoma in situ                                                                      | 185345                    | 1666                   |
| 5           | Exclude if prior cancer                                                                                        | 145299                    | 40046                  |
| 6           | Exclude if not pathologically confirmed                                                                        | 145131                    | 168                    |
| 7           | Include only if continuous fee-for-service Medicare coverage from 12 months prior to 24 months after diagnosis | 118556                    | 26575                  |
| 8           | Include if tumor size $\leq$ 5 cm                                                                              | 71904                     | 46652                  |
| 9           | Include if Tis-T2                                                                                              | 67980                     | 3924                   |
| 10          | Include if N0 or N1                                                                                            | 58377                     | 9603                   |
| 11          | Exclude if distant metastasis at diagnosis or if bilateral                                                     | 58272                     | 105                    |
| 12          | Exclude if second cancer diagnosed within 24 months                                                            | 58204                     | 68                     |
| 13          | Exclude if radiation given prior to surgery                                                                    | 58044                     | 160                    |
| 14          | Include only if treated with one of the 5 local therapy strategies                                             | 55327                     | 2717                   |

Abbreviations: SEER (Surveillance, Epidemiology, and End Results)

**eTable 2. Codes used to define procedures and diagnoses**

|                                   | ICD-9<br>Diagnosis  | CPT                                                                                                                                                                                                                                                         | ICD-9 Procedure                                                                                                                                                |
|-----------------------------------|---------------------|-------------------------------------------------------------------------------------------------------------------------------------------------------------------------------------------------------------------------------------------------------------|----------------------------------------------------------------------------------------------------------------------------------------------------------------|
| <b>Lumpectomy</b>                 |                     | 19112, 19110, 19120, 19125, 19126, 19160, 19162, 19301, 19302                                                                                                                                                                                               | 85.12, 85.2, 85.20-85.25                                                                                                                                       |
| <b>Mastectomy</b>                 |                     | 19180, 19182, 19200, 19220, 19240, 19303, 19304, 19305, 19306, 19307                                                                                                                                                                                        | 85.33-85.48, including 85.4                                                                                                                                    |
| <b>Reconstruction of any type</b> |                     | 19361, 19364, 19366, 19367, 19368, 19369, 19340, 19342, 19357, 19350, 19366, 19350                                                                                                                                                                          | 85.53, 85.54, 85.33, 85.35, 85.95, 85.70, 85.71, 85.72, 85.73, 85.74, 85.75, 85.76, 85.7, 85.79, 85.86, 85.82, 85.83, 85.84, 85.85, 85.89, 85.86, 85.93, 85.96 |
| <b>Chemotherapy</b>               | V58.1, V66.2, V67.2 | 96400-96549, J9000-J9999 (excluding: J9003, J9165, J9175, J9202, J9209, J9212-J9226, J9240, J9395), Q0083-Q0085, J8510, J8515, J8520, J8521, J8530, J8560, J8561, J8562, J8565, J8600, J8610, J8650, J8700, J8705, J8999, G0355, G0359, G0360, G0361, G0362 | 99.25                                                                                                                                                          |
| <b>External beam radiation</b>    |                     | 77401-77416, 77418, G0174                                                                                                                                                                                                                                   | 92.21-92.26                                                                                                                                                    |
| <b>Brachytherapy</b>              |                     | 77750-77799, 0182T                                                                                                                                                                                                                                          | 92.20, 92.27, 92.28                                                                                                                                            |

Abbreviations: CPT (Common Procedural Terminology), ICD (International Classification of Diseases)
